# Supplementary material for: Biocompatible and bioreducible micelles fabricated from novel α-amino acid-based poly(disulfide urethane)s: design, synthesis and triggered doxorubicin release
Source: Royal Society of Chemistry journal article supplement (doi:10.1039/c5py00828j), 2015-01-01
Supplement: c5py00828j1.pdf [file c5py00828j1.pdf]

Supporting Information

**Biocompatible and Bioreducible Micelles Fabricated from Novel  $\alpha$ -Amino Acid-Based Poly(disulfide urethane)s: Design, Synthesis and Triggered Doxorubicin Release**

Wentao Lu, Xiuxiu Wang, Ru Cheng\*, Chao Deng, Fenghua Meng, and Zhiyuan Zhong\*

Biomedical Polymers Laboratory, and Jiangsu Key Laboratory of Advanced Functional Polymer Design and Application, College of Chemistry, Chemical Engineering and Materials Science, Soochow University, Suzhou, 215123, P. R. China.

\* Corresponding authors. Tel/Fax: +86-512-65880098, E-mail: [rcheng@suda.edu.cn](mailto:rcheng@suda.edu.cn);  
[zyzhong@suda.edu.cn](mailto:zyzhong@suda.edu.cn)

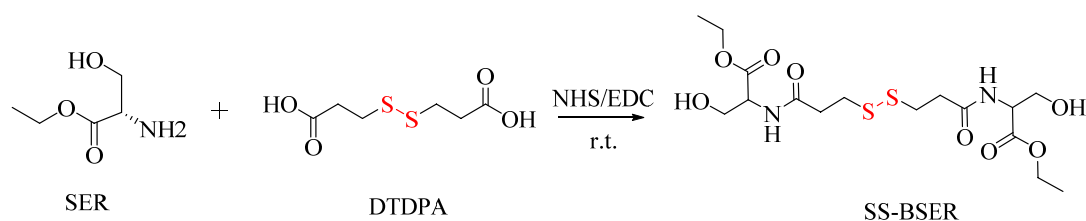

**Scheme S1** Synthesis of disulfide-linked bis(ethyl L-serinate) (SS-BSER).

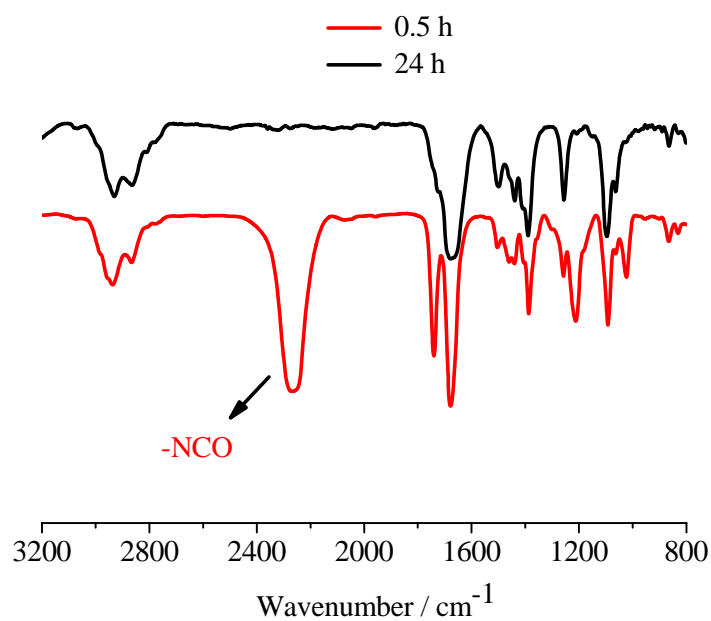

**Fig. S1** FT-IR spectra of polycondensation reaction mixture at 0.5 and 24 h (completion of polymerization).

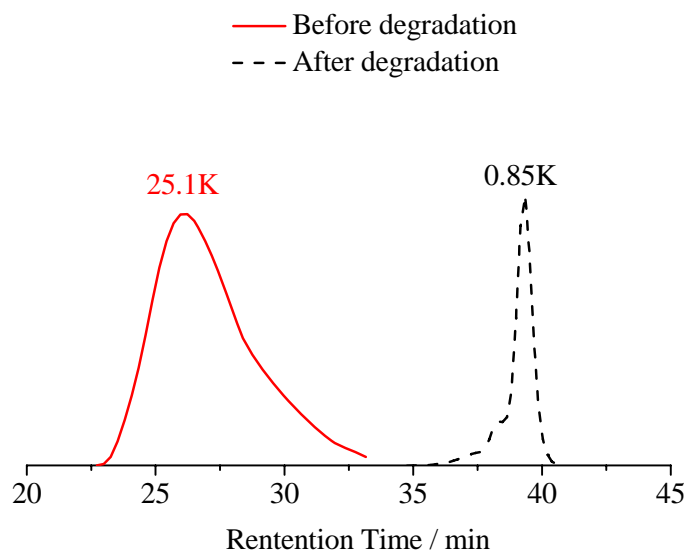

**Fig. S2** GPC curves of AAPU(SS)-2 before and after treating with 200 mM DTT.

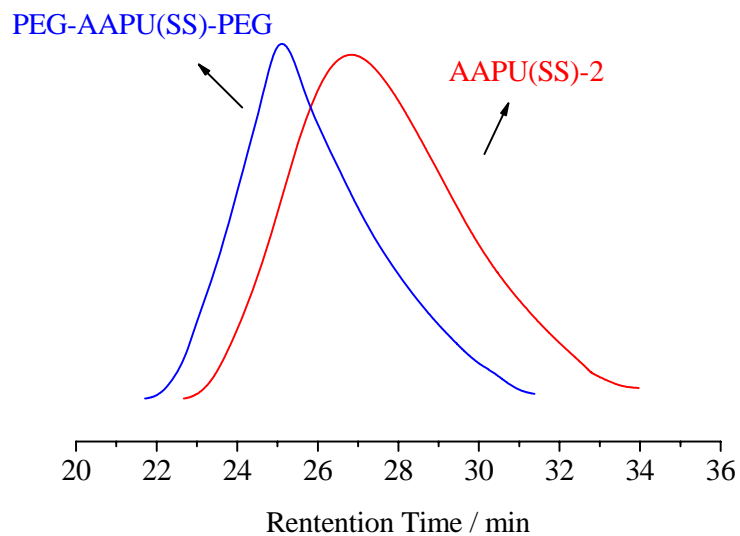

**Fig. S3** GPC curves of AAPU(SS)-2 and PEG-AAPU(SS)-PEG.

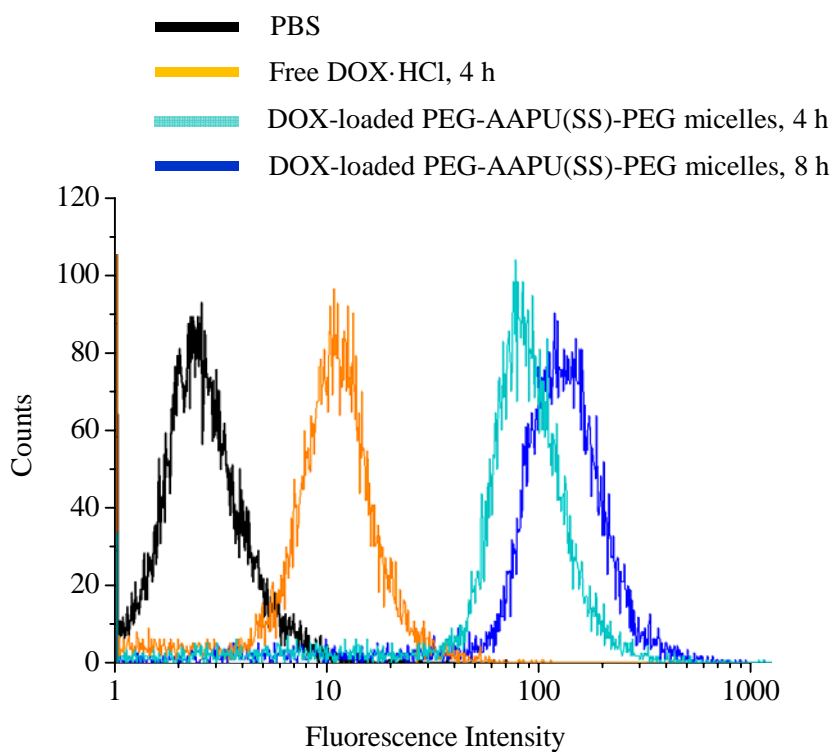

**Fig. S4** Flow cytometry measurements of cellular DOX level in MCF-7/ADR cells following 4 and 8 h incubation with DOX-loaded PEG-AAPU(SS)-PEG micelles (dosage: 10  $\mu$ g DOX equiv./mL, cell counts were 10000). Free DOX·HCl was used as a control.
